# Supplementary material for: Factors Associated with Vaccination Coverage among 0–59-Month-Old Children: A Multilevel Analysis of the 2020 Somaliland Demographic and Health Survey
Source: MDPI journal article supplement (doi:10.3390/vaccines12050509), 2024-05-08
Supplement: s1 [file s1]

## Supporting information: Report of vaccination with individual vaccines

Only 108 out of 2673 children had vaccination cards or documents, representing 4% of the total. The information regarding the individual vaccines that the children received was incomplete, with a high percentage of missing data for all individual childhood vaccines. A total of 61.4% of the BCG vaccine, 67.1% of the third dose of the polio vaccine, 71.5% of the third dose of the pentavalent vaccine, and 43.5% of the first dose of the measles vaccine had missing values (S1 Table).

Based on the available cases without missing data (excluding missing values), 35.6%, 28.1%, 48.2%, and 14.2% of those with complete data never received the Bacillus Calmette-Guérin (BCG) vaccine, the third dose of the polio vaccine, the third dose of the pentavalent vaccine and the first dose of the measles vaccine, respectively (S1 Table).

**Table S1. The proportion of basic childhood vaccinations among children under five years of age in Somaliland (including missing data) by age in months based on a national expanded program of immunization (EPI) guidelines.**

| Having a health card or vaccination document | Number | Percentage |  |  |  |
|----------------------------------------------|--------|------------|--|--|--|
| No                                           | 2,565  | 96%        |  |  |  |
| Yes                                          | 108    | 4%         |  |  |  |
| Total                                        | 2673   | 100%       |  |  |  |

  

| Ever had any vaccinations | Number | Percentage % | Age group in months |             |
|---------------------------|--------|--------------|---------------------|-------------|
|                           |        |              | Minimum age         | Maximum age |
| Never vaccinated          | 1763   | 66%          | 0                   | 56          |
| Ever vaccinated           | 910    | 34%          | 0                   | 57          |
| Total                     | 2673   | 100%         | ..                  | ..          |

  

| Bacillus Calmette-Guérin (BCG) vaccine | Number | Valid data (%) | Percentage % | Age group in months |             |
|----------------------------------------|--------|----------------|--------------|---------------------|-------------|
|                                        |        |                |              | Minimum age         | Maximum age |
| Not vaccinated                         | 367    | 35.6%          | 13.7%        | 0                   | 49          |
| On time vaccinated                     | 80     | 7.8%           | 3%           | 0                   | 10          |

|                                |             |       |       |     |      |
|--------------------------------|-------------|-------|-------|-----|------|
| <b>Delayed time vaccinated</b> | 584         | 56.6% | 21.9% | 11  | 56   |
| <b>Subtotal</b>                | 1031        | 100%  | ..    |     |      |
| <b>Missing values</b>          | 1642        | ..    | 61.4% | 0   | 59   |
| <b>Grand total</b>             | <b>2673</b> | ..    | 100%  | --- | ---- |

---

| <b>Polio vaccine dose 3</b>    | Number | Valid data (%) | Percentage % | Age group in months |             |
|--------------------------------|--------|----------------|--------------|---------------------|-------------|
|                                |        |                |              | Minimum age         | Maximum age |
| <b>Not vaccinated</b>          | 247    | 28.1%          | 9.2%         | 6                   | 55          |
| <b>On time vaccinated</b>      | 93     | 10.6%          | 3.5%         | 6                   | 18          |
| <b>Delayed time vaccinated</b> | 169    | 19.2.0%        | 6.3%         | 19                  | 47          |
| <b>Not applicable</b>          | 371    | 42.1%          | 13.9%        | 0                   | 5           |
| <b>Subtotal</b>                | 880    | 100%           | ..           |                     |             |
| <b>Missing values</b>          | 1793   | ..             | 67.1%        | 6                   | 59          |
| <b>Grand total</b>             | 2673   | ..             | 100%         | ---                 | ----        |

---

| <b>Pentavalent vaccine dose 3</b> | Number | Valid data (%) | Percentage % | Age group in months |             |
|-----------------------------------|--------|----------------|--------------|---------------------|-------------|
|                                   |        |                |              | Minimum age         | Maximum age |
| <b>Not vaccinated</b>             | 368    | 48.2%          | 13.8%        | 3                   | 56          |
| <b>On time vaccinated</b>         | 82     | 10.7%          | 3%           | 3                   | 18          |
| <b>Delayed time vaccinated</b>    | 127    | 16.6%          | 4.7%         | 19                  | 52          |
| <b>Not applicable</b>             | 186    | 24.4           | 7%           | 0                   | 2           |
| <b>Subtotal</b>                   | 763    | 100%           |              |                     |             |
| <b>Missing values</b>             | 1910   | ..             | 71.5%        | 3                   | 59          |
| <b>Grand total</b>                | 2673   | ..             | 100%         | ---                 | ----        |

---

| <b>Measles vaccine dose 1</b>              | Number | Valid data (%) | Percentage % | Age group in months |             |
|--------------------------------------------|--------|----------------|--------------|---------------------|-------------|
|                                            |        |                |              | Minimum age         | Maximum age |
| <b>Not vaccinated</b>                      | 215    | 14.2%          | 8%           | 12                  | 56          |
| <b>On time vaccinated<sup>1</sup></b>      | 72     | 4.8%           | 2.7%         | 12                  | 15          |
| <b>Delayed time vaccinated<sup>2</sup></b> | 537    | 35.5%          | 20.1%        | 16                  | 56          |
| <b>Not applicable<sup>3</sup></b>          | 687    | 46.5%          | 25.7%        | 0                   | 11          |
| <b>Sub total<sup>4</sup></b>               | 1511   | 100%           |              |                     |             |
| <b>Missing values</b>                      | 1162   |                | 43.5%        | 12                  | 59          |
| <b>Grand total<sup>5</sup></b>             | 2673   |                | 100%         | ---                 | ----        |

<sup>1</sup>Received the vaccine within the time recommended by the WHO

<sup>2</sup> Received the vaccine after the time recommended by the WHO

<sup>3</sup> Received the vaccine before the age scheduled by the WHO

<sup>4</sup> Total valid data without missing values

<sup>5</sup> Total value, including missing values

The prevalence of basic childhood BCG vaccines was 70.4%, the prevalence of polio vaccine dose three was 13.8%, the prevalence of measles vaccine dose one was 63.8%, and the prevalence of pentavalent vaccine dose three was 13.8%.
